# Supplementary material for: Virus discovery in all three major lineages of terrestrial arthropods highlights the diversity of single-stranded DNA viruses associated with invertebrates
Source: PeerJ. 2018 Oct 11;6:e5761. doi: 10.7717/peerj.5761 (PMC6186406; doi:10.7717/peerj.5761)
Supplement: Supplemental Information 2 — Excel workbook containing three worksheets (W#) with the following information: details regarding intrinsically disordered protein (IDP) profiles (W1), detailed information for sequences found in the alignment used to create approximately maximum likelihood tree shown in Figure 1 (Data S1) (W2), and a table listing accession numbers and information regarding non-CRESS DNA molecules detected in terrestrial arthropods (W3). [file peerj-06-5761-s002.xlsx]

## Sheet: Coversheet
Supplemental Data S2
Manuscript: Virus discovery in all three major lineages of terrestrial arthropods highlights the diversity of single-stranded DNA viruses associated with invertebrates
Authors: Karyna Rosario, Kaitlin A. Mettel, Bayleigh E. Benner, Ryan Johnson, Catherine Scott, Sonath Z. Yusseff-Vanegas, Christopher C. M. Baker, Deby L. Cassill, Caroline Storer, Arvind Varsani and Mya Breitbart
Supplemental Data S2 Description: This Excel workbook contains the following information in each of the worksheets (W#):
W1_IDPs: Contains intrinsincally disorder protein (IDP) profiles for non-Rep hypothetical proteins encoded by CRESS DNA genomes identified in this study. IDP profiles were created using the neural network based VL3 disorder predictor on DisProt (http://www.dabi.temple.edu/disprot/predictor.php)
W2_Fig1_SeqInfo: Contains sequence information for Rep sequences included in the phylogenetic analysis shown in Figure 1. The alignment used for the phylogenetic analysis can be found in Supplemental Data S1 in fasta format.
W3_NonCRESS-DNA: Table listing sample and genome information for non-CRESS DNA molecules detected in this study.
Notes
Rep = replication-associated protein; CRESS DNA = circular Rep-encoding DNA
For more information regarding IDP profiles see Rosario et al. 2015*
*Rosario, K., Schenck, R.O., Harbeitner, R.C., Lawler, S.N., Breitbart, M., 2015. Novel circular single-stranded DNA viruses identified in marine invertebrates reveal high sequence diversity and consistent predicted intrinsic disorder patterns within putative structural proteins. Front Microbiol 6, 696

## Sheet: W1_IDPs
									Note:
									High disorder at N-terminus (Type A); however, capsid seems truncated (<200aa)
									Note:
									High disorder at N-terminus (Type A)
									Note:
									High disorder within first 100 amino acid residues (not Type A nor Type B)
									Note:
									High disorder at N-terminus (Type A)
									Note:
									High disorder within first 100 amino acid residues (Type B)
									Note:
									High disorder at N-terminus (Type A)
									Note:
									High disorder at N-terminus (Type B)
									Note:
									Ordered N-terminus; ORF did not contain a standard start codon
									Note:
									High disorder within first 100 amino acid residues (not Type A nor Type B)
									Note:
									High disorder at N-terminus (Type A)

## Sheet: W2_Fig1_SeqInfo
Sequence name as it appears in alignment file (Supplemental Data S1)	Accession Number	Description	Notes/Reference for sequences not found in GenBank			References:
MolusCV1	KX812440	Molossus molossus circovirus 1 isolate MmoCV_MF_77202, complete genome				Liu, H.Q., Fu, Y.P., Li, B., Yu, X., Xie, J.T., Cheng, J.S., Ghabrial, S.A., Li, G.Q., Yi, X.H., Jiang, D.H., 2011. Widespread horizontal gene transfer from circular single-stranded DNA viruses to eukaryotic genomes. BMC Evol Biol 11, 276
MolusCV2	KX812441	Molossus molossus circovirus 2 isolate MmoCV_MF_110233, complete genome
CEV_Tricho	XP_002109721	Hypothetical protein TRIADDRAFT_52877 [Trichoplax adhaerens]	CEV identified by Liu et al. 2011			Bettarel, Y., Halary, S., Auguet, J.-C., Mai, T.C., Van Bui, N., Bouvier, T., Got, P., Bouvier, C., Monteil-Bouchard, S., Christelle, D., 2018. Corallivory and the microbial debacle in two branching scleractinians. The ISME Journal 12, 1109-1126
PcCV-1	KY113128	Pleurochrysis carterae circular virus isolate PcCV-1, complete genome
PoCV-15V	KY214434	Porcine stool-associated circular virus/BEL/15V010 isolate 15V010				Tikhe, C.V., Husseneder, C., 2017. Metavirome sequencing of the termite gut reveals the presence of an unexplored bacteriophage community. Front Microbiol 8, 2548
MolusCV4	KX812443	Molossus molossus circovirus 4 isolate MmoCV_MU_36925, complete genome
EchinoCV7	KX246257	Uncultured virus clone AfaCV2, complete genome (sea star associated)				Dennis, T.P.W., Flynn, P.J., Marciel de Souza, W., Singer, J.B., Moreau, C.S., Wilson, S.J., Gifford, R.J., 2018. Insights into circovirus host range from the genomic fossil record. J Virol
Coral1	na	Coral associated CRESS DNA virus, Genotype 1 (D89_contig_34|Genotype_1)	Bettarel et al. 2018
Circo_yc14	KY312553	Circovirus sp. isolate yc-14 (bird associated)
Circo_yc15	KY312554	Circovirus sp. isolate yc-15 (bird associated)
Circo_yc16	KY312555	Circovirus sp. isolate yc-16 (bird associated)
Circo_yc17	KY312556	Circovirus sp. isolate yc-17 (bird associated)
RtRf-CV1	KY370025	Rodent circovirus isolate RtRf-CV-1/YN2013 Rep gene, complete cds
RtCb-CV1	KY370030	Rodent circovirus isolate RtCb-CV-1/HeB2014 Rep gene, complete cds
RtNf-CV	KY370033	Rodent circovirus isolate RtNf-CV/HaiN2015 Rep gene, complete cds
RtBi-CV1	KY370035	Rodent circovirus isolate RtBi-CV-1/FJ2015 Rep gene, complete cds
RtBi-CV2	KY370036	Rodent circovirus isolate RtBi-CV-2/FJ2015 Rep gene, complete cds
Shrew-CV	KY370040	Shrew circovirus isolate Shrew-CV/Tibet2014 Rep gene, complete cds
Termite8	na	Termite_Col2_LSPZ01000606	Tikhe et al. 2018
Termite2	na	Termite_Col1_LSPY01000307	Tikhe et al. 2018
RtAc-CV1	KY370041	Rodent circovirus isolate RtAc-CV-1/GZ2015 Rep gene, complete cds
CattleCV2	MF669476	Cattle blood-associated circovirus-like virus strain Bvch005
CEV_Entam1	XM_004185684	Entamoeba invadens IP1 replication-associated protein, putative (EIN_004330) mRNA	CEV identified by Liu et al. 2011
CattleCV6	MF669477	Cattle blood-associated circovirus-like virus strain Bvch002
CattleBGm	MF669479	Cattle blood-associated gemycircularvirus strain BGmv002
Chaeto1	AB971658	Chaetoceros tenuissimus DNA virus type-II DNA, isolate: SS10-8V
Chaeto3	AB971660	Chaetoceros tenuissimus DNA virus type-II DNA, isolate: SS10-35V
CircoTM6	HM228875	Circoviridae TM-6c putative Rep and putative Cap genes, complete cds
MS584-5	HQ322117	Picobiliphyte sp. MS584-5 nanovirus
VEM-SDRBAJ	HQ335087	Mosquito VEM virus SDRBAJ
Po-Circo21	JF713716	Po-Circo-like virus 21 (pig feces associated)
Po-Circo41	JF713718	Po-Circo-like virus 41 (pig feces associated)
Po-Circo51	JF713719	Po-Circo-like virus 51 (pig feces associated)
RodSCV_R15	JF755401	Rodent stool-associated circular genome virus strain R-15
RodSCV_M89	JF755402	Rodent stool-associated circular genome virus strain RodSCV_M-89
RodSCV_V69	JF755403	Rodent stool-associated circular genome virus strain RodSCV_V-69
RodSCV_V76	JF755404	Rodent stool-associated circular genome virus strain RodSCV_V-76
ChickSCV	KY056251	Chicken stool-associated circular virus, complete genome
RodSCV_M44	JF755408	Rodent stool-associated circular genome virus strain RodSCV_M-44
RodSCV_M45	JF755409	Rodent stool-associated circular genome virus strain RodSCV_M-45
RodSCV_M13	JF755410	Rodent stool-associated circular genome virus strain RodSCV_M-13
RodSCV_M53	JF755415	Rodent stool-associated circular genome virus strain RodSCV_M-53
LaCopCV	JF912805	Labidocera aestiva circovirus
BatYN-BtCV1	JF938078	Bat circovirus ZS/China/2011 isolate YN-BtCV-1
BovineCP11	JN634851	Circoviridae bovine stool/BK/KOR/2011 isolate CP11-49-3
MelesVS47	JN704610	Meles meles fecal virus isolate VS4700006
Bat_SC703	JN857329	Circoviridae batCV-SC703 putative Rep and putative Cap genes, complete cds
MelesCV	JQ085285	Meles meles circovirus-like virus
AcCopCV	JQ837277	Acartia tonsa copepod circovirus isolate 154_D11
DfCircu	JX185415	Dragonfly circularisvirus isolate TO-DF3E-2010
DflOrbi_1	JX185416	Dragonfly orbiculatusvirus isolate TO-DF13-2010
DfCycli	JX185418	Dragonfly cyclicusvirus isolate FL1-NZ37-2010
Brazil_hs1	JX559621	Circo-like virus-Brazil hs1 (human feces associated)
Termite3	na	Termite_Col1_LSPY01000329	Tikhe et al. 2018
Gastropod	KC172652	Gastropod associated circular ssDNA virus strain chc
Daphnia1	KC248412	Daphnia mendotae-associated RNA-DNA hybrid virus clone DVJContig596, complete sequence
Diporeia1	KC248416	Diporeia sp. associated circular virus isolate LM3487 replication-associated protein and hypothetical protein genes, complete cds
Diporeia2	KC248417	Diporeia sp. associated circular virus isolate OL7115 replication-associated protein and hypothetical protein genes, complete cds
Diporeia3	KC248418	Diporeia sp. associated circular virus isolate OL7433 replication-associated protein and hypothetical protein genes, complete cds
Diporeia6	KC248422	Diporeia sp. associated circular virus isolate LM19063 replication-associated protein and hypothetical protein genes, complete cds
Diporeia4	KC248419	Diporeia sp. associated circular virus isolate OL36582 replication-associated protein gene, complete cds
Diporeia5	KC248420	Diporeia sp. associated circular virus isolate LM29173 replication-associated protein and hypothetical protein genes, complete cds
Diporeia7	KC248423	Diporeia sp. associated circular virus isolate LM3602 replication-associated protein and capsid protein genes, complete cds
Diporeia9	KC248425	Diporeia sp. associated circular virus isolate LM28925 hypothetical protein and replication-associated protein genes, complete cds
EchinoCV3	KX246261	Uncultured virus clone PcaCV1, complete genome (sea cucumber associated)
EchinoCV6	KX246258	Uncultured virus clone AfaCV5, complete genome (sea star associated)
CEV_Caligus	na	CVl.Caligus_rogercresseyi.1	CEV identified by Dennis et al. 2018
CEV_Caligu2	na	CVl.Caligus_rogercresseyi.3	CEV identified by Dennis et al. 2018
Farfan	KC441518	Farfantepenaeus duorarum circovirus isolate FL2009
Volvo_IAF	KC543331	Acheta domesticus volvovirus isolate IAF
Po2f	KC545226	Porcine stool-associated circular virus 2 isolate f
Seal_as50	KF246569	Fur seal faeces associated circular DNA virus isolate as50
PenaeusVN	KF481961	Penaeus monodon circovirus VN11
DflaCV-1	KF738873	Dragonfly larvae associated circular virus-1 isolate DflaCV-1_NZ-PG11-LD
DflaCV-2	KF738874	Dragonfly larvae associated circular virus-2 isolate DflaCV-2_NZ-PG8-LS
DflaCV-3	KF738875	Dragonfly larvae associated circular virus-3 isolate DflaCV-3_NZ-PG1-LG
DflaCV-4	KF738877	Dragonfly larvae associated circular virus-4 isolate DflaCV-4_NZ-PG3-LG
DflaCV-5	KF738878	Dragonfly larvae associated circular virus-5 isolate DflaCV-5_NZ-PG2-LG
DflaCV-6	KF738880	Dragonfly larvae associated circular virus-6 isolate DflaCV-6_NZ-PG9-LD
DflaCV-7	KF738881	Dragonfly larvae associated circular virus-7 isolate DflaCV-7_NZ-PG5-LH
DflaCV-8	KF738882	Dragonfly larvae associated circular virus-8 isolate DflaCV-8_NZ-PG5-LS
DflaCV-9	KF738883	Dragonfly larvae associated circular virus-9 isolate DflaCV-9_NZ-PG10-LD
DflaCV-10	KF738884	Dragonfly larvae associated circular virus-10 isolate DflaCV-10_NZ-XZ2-LS
HuVS66	KJ206566	Human circovirus VS6600022
Po4_CP2	KJ417134	Porcine stool-associated circular virus 4 isolate CP2
Po5_CP3	KJ433989	Porcine stool-associated circular virus 5 isolate CP3
PoCV8_GP2	KJ577817	Porcine stool-associated circular virus 8 isolate GP2
PoCV6_XP1	KJ577819	Porcine stool-associated circular virus 6 isolate XP1
BatBtRpCV6	KJ641713	Bat circovirus isolate BtRp-CV-6/GD2012
BatBtMfCV1	KJ641718	Bat circovirus isolate BtMf-CV-1/GD2012
BatBtTpCV3	KJ641721	Bat circovirus isolate BtTp-CV-3/GX2012
BatBtMfCV	KJ641722	Bat circovirus isolate BtMf-CV/HeN2013
BatBtMfCVb	KJ641733	Bat circovirus isolate BtMf-CV/SAX2011
BatBtRf-CV1	KJ641725	Bat circovirus isolate BtRf-CV-1/NM2013
BtBtRfCV1b	KJ641739	Bat circovirus isolate BtRf-CV-1/YN2010
BatBtPaCV3	KJ641729	Bat circovirus isolate BtPa-CV-3/NX2013
BatBtMlCV	KJ641730	Bat circovirus isolate BtMl-CV/QH2013
BatBtRpCV	KJ641731	Bat circovirus isolate BtRp-CV/SD2013
BatBtRfCV	KJ641732	Bat circovirus isolate BtRf-CV/SX2013
BatBtRhCV1	KJ641735	Bat circovirus isolate BtRh-CV-1/Tibet2013
BatBtRhCV7	KJ641738	Bat circovirus isolate BtRh-CV-7/Tibet2013
Caribou	KJ938716	Ancient caribou feces associated virus
Fruit_MFB4	KJ955447	Temperate fruit decay-associated virus isolate MFB4
BasCV-1	KM510189	Bromus-associated circular DNA virus 1 isolate BasCV-1_NZ-NZG01_Sef-2012
BasCV-2	KM510191	Bromus-associated circular DNA virus 2 isolate BasCV-2_NZ-NZG03_Wel-2012
DcSCV_1	KM573763	Dromedary stool-associated circular ssDNA virus isolate DcSCV_c954
DcSCV_2	KM573764	Dromedary stool-associated circular ssDNA virus isolate DcSCV_c1000
DcSCV_3	KM573765	Dromedary stool-associated circular ssDNA virus isolate DcSCV_c941
Hudisa	MF351513	Hudisavirus sp. isolate P18, complete genome (human feces associated)
DcSCV_4	KM573766	Dromedary stool-associated circular ssDNA virus isolate DcSCV_c1054
DcSCV_5	KM573767	Dromedary stool-associated circular ssDNA virus isolate DcSCV_c1422
DcSCV_6	KM573768	Dromedary stool-associated circular ssDNA virus isolate DcSCV_c1322
DcSCV_7	KM573769	Dromedary stool-associated circular ssDNA virus isolate DcSCV_c1359
DcSCV_8	KM573770	Dromedary stool-associated circular ssDNA virus isolate DcSCV_c1072
DcSCV_11	KM573773	Dromedary stool-associated circular ssDNA virus isolate DcSCV_c1009
DcSCV_12	KM573774	Dromedary stool-associated circular ssDNA virus isolate DcSCV_c1330
DcSCV_13	KM573775	Dromedary stool-associated circular ssDNA virus isolate DcSCV_c1358
DcSCV_14	KM573776	Dromedary stool-associated circular ssDNA virus isolate DcSCV_c1566
OdasCV6	KM598389	Odonata-associated circular virus-6 isolate OdasCV-6-US-1642LM1-12
OdasCV7	KM598390	Odonata-associated circular virus-7 isolate OdasCV-7-US-1706LM1-12
OdasCV8	KM598391	Odonata-associated circular virus-8 isolate OdasCV-8-US-1739LM1-12
OdasCV9	KM598392	Odonata-associated circular virus-9 isolate OdasCV-9-US-466DFS-12
OdasCV1	KM598393	Odonata-associated circular virus-1 isolate OdasCV-1-US-504LB-12
OdasCV11	KM598394	Odonata-associated circular virus-11 isolate OdasCV-11-US-341DFS-12
OdasCV12	KM598395	Odonata-associated circular virus-12 isolate OdasCV-12-US-1518LM1-12
OdasCV13	KM598396	Odonata-associated circular virus-13 isolate OdasCV-13-US-1591LM1-12
OdasCV14	KM598397	Odonata-associated circular virus-14 isolate OdasCV-14-US-1577SC3-12
CEV_Entam5	XP_001738227	Replication-associated protein [Entamoeba dispar SAW760]	CEV identified by Liu et al. 2011
CEV_Entam3	XP_652805	Hypothetical protein EHI_145480 [Entamoeba histolytica HM-1:IMSS]	CEV identified by Liu et al. 2011
CEV_Entam2	XP_648754	Hypothetical protein EHI_193630 [Entamoeba histolytica HM-1:IMSS]	CEV identified by Liu et al. 2011
OdasCV15	KM598398	Odonata-associated circular virus-15 isolate OdasCV-15-US-1640LM1-12
CEV_Smitti	OMJ21113	Replication-associated protein [Smittium culicis]	CEV identified through BLAST searches
OdasCV2	KM598399	Odonata-associated circular virus-2 isolate OdasCV-2-US-364BC-12
OdasCV17	KM598400	Odonata-associated circular virus-17 isolate OdasCV-17-US-1619LM1-12
CEV_Entam4	XP_001913723	Hypothetical protein EHI_168860 [Entamoeba histolytica HM-1:IMSS]	CEV identified by Liu et al. 2011
OdasCV18	KM598401	Odonata-associated circular virus-18 isolate OdasCV-18-US-1735LM1-12
OdasCV19a	KM598404	Odonata-associated circular virus-19 isolate OdasCV-19-US-1594LM1-12
OdasCV20	KM598406	Odonata-associated circular virus-20 isolate OdasCV-20-US-718DFS-12
CEV_Ephydr4	na	CVe.Ephydra_hians.7	CEV identified by Dennis et al. 2018
OdasCV3	KM598407	Odonata-associated circular virus-3 isolate OdasCV-3-US-221LB1-12
OdasCV4	KM598408	Odonata-associated circular virus-4 isolate OdasCV-4-US-517BC-12
I0996-I60	MH545529	Long-jawed orbweaver circular virus 2 (LjOrbCV-2)
OdasCV21	KM598409	Odonata-associated circular virus-21 isolate OdasCV-21-US-1679SC3-12
OdasCV16	KM598411	Odonata-associated circular virus-16 isolate OdasCV-16-US-1614LM1-12
OdasCV10	KM598412	Odonata-associated circular virus-10 isolate OdasCV-10-US-1675LM1-12
AHEaCV1	KM874290	Avon-Heathcote Estuary associated circular virus 1 isolate AHEaCV-1-NZ-2981C1-2012
AHEaCV2	KM874292	Avon-Heathcote Estuary associated circular virus 2 isolate AHEaCV-2-NZ-3024C1-2012
AHEaCV3a	KM874295	Avon-Heathcote Estuary associated circular virus 3 isolate AHEaCV-3-NZ-3030C2-2012
AHEaCV4	KM874298	Avon-Heathcote Estuary associated circular virus 4 isolate AHEaCV-4-NZ-3049C1-2012
AHEaCV5	KM874301	Avon-Heathcote Estuary associated circular virus 5 isolate AHEaCV-5-NZ-3091C2-2012
EchinoCV1	KX246264	Uncultured virus clone PcaCV2, complete genome (sea cucumber associated)
CEV_Ephydr8	na	CVl.Ephydra_gracilis.8	CEV identified by Dennis et al. 2018
CEV_Ephydr5	na	CVe.Ephydra_hians.8	CEV identified by Dennis et al. 2018
Termite5	na	Termite_Col1_LSPY01000133	Tikhe et al. 2018
AHEaCV6	KM874304	Avon-Heathcote Estuary associated circular virus 6 isolate AHEaCV-6-NZ-3103C1-2012
EchinoCV2	KX246262	Uncultured virus clone PcaCV4, complete genome (sea cucumber associated)
TaCV1	MF804497	Circoviridae TaCV1, complete genome (bird associated)
AHEaCV7	KM874309	Avon-Heathcote Estuary associated circular virus 7 isolate AHEaCV-7-NZ-3107C3-2012
CEV_Ephydr3
AHEaCV8	KM874310	Avon-Heathcote Estuary associated circular virus 8 isolate AHEaCV-8-NZ-3159C1-2012
AHEaCV9	KM874315	Avon-Heathcote Estuary associated circular virus 9 isolate AHEaCV-9-NZ-3171C1-2012
AHEaCV10	KM874319	Avon-Heathcote Estuary associated circular virus 10 isolate AHEaCV-10-NZ-3241C2-2012
AHEaCV11	KM874323	Avon-Heathcote Estuary associated circular virus 11 isolate AHEaCV-11-NZ-3371C1-2012
AHEaCV12	KM874328	Avon-Heathcote Estuary associated circular virus 12 isolate AHEaCV-12-NZ-3316C1-2012
AHEaCV13	KM874329	Avon-Heathcote Estuary associated circular virus 13 isolate AHEaCV-13-NZ-3331CO-2012
AHEaCV14	KM874332	Avon-Heathcote Estuary associated circular virus 14 isolate AHEaCV-14-NZ-3348C3-2012
AHEaCV15	KM874336	Avon-Heathcote Estuary associated circular virus 15 isolate AHEaCV-15-NZ-3424C1-2012
AHEaCV16	KM874340	Avon-Heathcote Estuary associated circular virus 16 isolate AHEaCV-16-NZ-3310C1-2012
AHEaCV17	KM874343	Avon-Heathcote Estuary associated circular virus 17 isolate AHEaCV-17-NZ-2032TU-2012
AHEaCV18b	KM874346	Avon-Heathcote Estuary associated circular virus 18 isolate AHEaCV-18-NZ-4778GA-2012
AHEaCV19	KM874347	Avon-Heathcote Estuary associated circular virus 19 isolate AHEaCV-19-NZ-4942GA-2012
EchinoCV9	na	CVe.Ephydra_hians.6	CEV identified by Dennis et al. 2018
AHEaCV20	KM874348	Avon-Heathcote Estuary associated circular virus 20 isolate AHEaCV-20-NZ-4957GA-2012
AHEaCV21	KM874350	Avon-Heathcote Estuary associated circular virus 21 isolate AHEaCV-21-NZ-2050TU-2012
AHEaCV22	KM874351	Avon-Heathcote Estuary associated circular virus 22 isolate AHEaCV-22-NZ-2138TU-2012
Termite4	na	Termite_Col1_LSPY01000392	Tikhe et al. 2018
AHEaCV23	KM874353	Avon-Heathcote Estuary associated circular virus 23 isolate AHEaCV-23-NZ-2161TU-2012
AHEaCV24	KM874354	Avon-Heathcote Estuary associated circular virus 24 isolate AHEaCV-24-NZ-2183TU-2913
AHEaCV25	KM874355	Avon-Heathcote Estuary associated circular virus 25 isolate AHEaCV-25-NZ-2942CO-2012
Planaria	AAK53631	Planaria asexual strain-specific virus-like element type 1
AHEaCV26	KM874359	Avon-Heathcote Estuary associated circular virus 26 isolate AHEaCV-26-NZ-2311TU-2012
AHEaCV27	KM874360	Avon-Heathcote Estuary associated circular virus 27 isolate AHEaCV-27-NZ-2332TU-2012
AHEaCV29	KM874366	Avon-Heathcote Estuary associated circular virus 29 isolate AHEaCV-29-NZ-3425C1-2012
MosqB19	KM972725	Mosquito circovirus strain B19
TasCV1_FR34	KP005453	Trifolium-associated circular DNA virus 1 isolate TasCV-1_FR34-34-Cam
BasCV4_FR38	KP005454	Bromus-associated circular DNA virus 4 isolate BasCV-4_FR38-38-Cam
LSaCM1	KP153359	Lake Sarah-associated circular molecule 1 isolate LSaCM-1-LSCO-2013, complete sequence (mollusc associated)
LSaCM2	KP153360	Lake Sarah-associated circular molecule 2 isolate LSaCM-2-LSMU-2013, complete sequence (mollusc associated)
LSaCM3	KP153361	Lake Sarah-associated circular molecule 3 isolate LSaCM-3-LSMU-2013, complete sequence (mollusc associated)
LSaCM5	KP153364	Lake Sarah-associated circular molecule 5 isolate LSaCM-5-LSWO-2013, complete sequence (insect associated)
LSaCM12	KP153371	Lake Sarah-associated circular molecule 8 isolate LSaCM-8-LSGA-2013, complete sequence (snail associated)
LSaCM18	KP153377	Lake Sarah-associated circular molecule 9 isolate LSaCM-9-LSLA-2013, complete sequence (dragonfly associated)
LSaCM20	KP153379	Lake Sarah-associated circular molecule 10 isolate LSaCM-10-LSLA-2013, complete sequence (dragonfly associated)
LSa1LSCO	KP153390	Lake Sarah-associated circular virus-1 isolate LSaCV-1-LSCO-2013, complete sequence (mollusc associated)
LSa2LSGA	KP153394	Lake Sarah-associated circular virus-2 isolate LSaCV-2-LSGA-2013, complete sequence (snail associated)
LSa3LSWO	KP153395	Lake Sarah-associated circular virus-3 isolate LSaCV-3-LSWO-2013, complete sequence (insect associated)
LSa8LSCO	KP153405	Lake Sarah-associated circular virus-8 isolate LSaCV-8-LSCO-2013, complete sequence (mollusc associated)
Coral55	na	Coral associated CRESS DNA virus genotype 55 (D89_contig_26|Genotype_55)	Bettarel et al. 2018
LSa11LSMU	KP153409	Lake Sarah-associated circular virus-11 isolate LSaCV-11-LSMU-2013, complete sequence (mollusc associated)
LSa12LSCO	KP153410	Lake Sarah-associated circular virus-12 isolate LSaCV-12-LSCO-2013, complete sequence (mollusc associated)
LSa14LSMU	KP153414	Lake Sarah-associated circular virus-14 isolate LSaCV-14-LSMU-2013, complete sequence (mollusc associated)
LSa15LSWO	KP153417	Lake Sarah-associated circular virus-15 isolate LSaCV-15-LSWO-2013, complete sequence (insect associated)
LSa16LSMUb	KP153420	Lake Sarah-associated circular virus-16 isolate LSaCV-16-LSMU-122865-13, complete sequence (mollusc associated)
LSa17LSMU	KP153424	Lake Sarah-associated circular virus-17 isolate LSaCV-17-LSMU-2013, complete sequence (mollusc associated)
LSa19LSMU	KP153429	Lake Sarah-associated circular virus-19 isolate LSaCV-19-LSMU-2013, complete sequence (mollusc associated)
Coral84	na	Coral associated CRESS DNA virus genotype 84 (D89_contig_726|Genotype_84)	Bettarel et al. 2018
EchinoCV4	KX246260	Uncultured virus clone SdaCV1, complete genome (sea urchin associated)
LSa23LSMU	KP153442	Lake Sarah-associated circular virus-23 isolate LSaCV-23-LSMU-2013, complete sequence (mollusc associated)
LSa25LSMU	KP153445	Lake Sarah-associated circular virus-25 isolate LSaCV-25-LSMU-2013, complete sequence (mollusc associated)
LSa26LSMU	KP153446	Lake Sarah-associated circular virus-26 isolate LSaCV-26-LSMU-2013, complete sequence (mollusc associated)
LSa28LSGA	KP153451	Lake Sarah-associated circular virus-28 isolate LSaCV-28-LSGA-2013, complete sequence (snail associated)
CEV_Phaeo	ABQD01000138	Phaeodactylum tricornutum_EST (ABQD01000138.1:26335-27312)	CEV identified by Liu et al. 2011
LSa29LSGA	KP153454	Lake Sarah-associated circular virus-29 isolate LSaCV-29-LSGA-2013, complete sequence (snail associated)
LSa31LSGA	KP153459	Lake Sarah-associated circular virus-31 isolate LSaCV-31-LSGA-2013, complete sequence (snail associated)
LSa32LSGA	KP153464	Lake Sarah-associated circular virus-32 isolate LSaCV-32-LSGA-2013, complete sequence (snail associated)
CEV_Triops	na	CVl.Triops_cancriformis.1	CEV identified by Dennis et al. 2018
LSa33LSGA	KP153469	Lake Sarah-associated circular virus-33 isolate LSaCV-33-LSGA-2013, complete sequence (snail associated)
LSa34LSGA	KP153470	Lake Sarah-associated circular virus-34 isolate LSaCV-34-LSGA-2013, complete sequence (snail associated)
LSa36LSGA	KP153474	Lake Sarah-associated circular virus-36 isolate LSaCV-36-LSGA-2013, complete sequence (snail associated)
LSa38LSGA	KP153483	Lake Sarah-associated circular virus-38 isolate LSaCV-38-LSGA-2013, complete sequence (snail associated)
LSa39LSGA	KP153485	Lake Sarah-associated circular virus-39 isolate LSaCV-39-LSGA-2013, complete sequence (snail associated)
LSa40LSCO	KP153488	Lake Sarah-associated circular virus-40 isolate LSaCV-40-LSCO-103520-13, complete sequence (mollusc associated)
LSa35LSCO	KP153490	Lake Sarah-associated circular virus-35 isolate LSaCV-35-LSCO-2013, complete sequence (mollusc associated)
LSa41LSCO	KP153494	Lake Sarah-associated circular virus-41 isolate LSaCV-41-LSCO-2013, complete sequence (mollusc associated)
LSa42LSCO	KP153496	Lake Sarah-associated circular virus-42 isolate LSaCV-42-LSCO-2013, complete sequence (mollusc associated)
LSa43LSCO	KP153499	Lake Sarah-associated circular virus-43 isolate LSaCV-43-LSCO-2013, complete sequence (mollusc associated)
LSa44LSCO	KP153500	Lake Sarah-associated circular virus-44 isolate LSaCV-44-LSCO-2013, complete sequence (mollusc associated)
CEV_Ephydr1	na	CVe.Ephydra_hians.2	CEV identified by Dennis et al. 2018
LSa45LSCO	KP153501	Lake Sarah-associated circular virus-45 isolate LSaCV-45-LSCO-2013, complete sequence (mollusc associated)
LSa47LSCO	KP153504	Lake Sarah-associated circular virus-47 isolate LSaCV-47-LSCO-2013, complete sequence (mollusc associated)
LSa48LSCO	KP153505	Lake Sarah-associated circular virus-48 isolate LSaCV-48-LSCO-2013, complete sequence (mollusc associated)
Termite7	na	Termite_Col2_LSPZ01000878	Tikhe et al. 2018
LSa49LSGA	KP153507	Lake Sarah-associated circular virus-49 isolate LSaCV-49-LSGA-2013, complete sequence (snail associated)
LSa50LSCO	KP153511	Lake Sarah-associated circular virus-50 isolate LSaCV-50-LSCO-2013, complete sequence (mollusc associated)
LSa51	KP153522	Lake Sarah-associated circular virus-51 isolate LSaCV-51-LSMU-2013, complete sequence (mollusc associated)
Apteryx	KP202150	Apteryx rowi circovirus-like virus isolate JWNM 090913
HSmaco1_11	KP233174	Human smacovirus 1 isolate France/8/2008/2444
Smaco_SF5	KP233194	Lemur smacovirus isolate SF5
Asterias	KR186219	Asterias forbesi associated circular virus isolate SS-2A
CrabI0004A	KR528543	Petrochirus diogenes giant hermit crab associated circular virus isolate I0004A
Aiptasia1	KR528544	Aiptasia sp. sea anemone associated circular virus isolate I0007C2
Aiptasia2	KR528545	Aiptasia sp. sea anemone associated circular virus isolate I0007C3
SeaSq1	KR528546	Didemnum sp. Sea Squirt associated virus isolate I0026A4
SeaSq2	KR528547	Didemnum sp. Sea Squirt associated virus isolate I0026A7
Littorina	KR528548	Littorina sp. associated circular virus isolate I0041
BlueCrab	KR528549	Callinectes ornatus blue crab associated circular virus isolate I0054
CalliI0056	KR528550	Callinectes sapidus associated circular virus isolate I0056
Shrimp1	KR528551	Palaemonetes intermedius brackish grass shrimp associated circular virus isolate I0059
Shrimp3	KR528553	Farfantepenaeus duorarum pink shrimp associated circular virus isolate I0069
Snail	KR528554	Marine snail associated circular virus isolate I0084
HerCrab1	KR528555	Hermit crab associated circular virus isolate I0085A4
HerCrab3	KR528557	Hermit crab associated circular genome isolate I0085b
FiddCrab1	KR528558	Fiddler Crab associated circular virus isolate I0086a
Shrimp4	KR528560	Palaemonetes kadiakensis Mississippi grass shrimp associated circular virus isolate I0099
Amphipod	KR528561	Gammarus sp. amphipod associated circular virus isolate I0153
Clam	KR528562	Mytilus sp. clam associated circular virus isolate I0169
Copepod	KR528563	Calanoida sp. copepod associated circular virus isolate I0298
EchinoCV8	KX246256	Uncultured virus clone AfaCV4, complete genome (sea star associated)
EchinoCV5	KX246259	Uncultured virus clone SdaCV2, complete genome (sea urchin associated)
CEV_Ephydr6	na	CVl.Ephydra_gracilis.6	CEV identified by Dennis et al. 2018
Sponge	KR528564	Artemia melana sponge associated circular genome isolate I0307
Coral	KR528565	Primnoa pacifica coral associated circular virus isolate I0345
Paramuricea	KR528566	Paramuricea placomus associated circular virus isolate I0351
ChimpCPNG	KR704912	Chimpanzee faeces associated circular DNA virus 1 isolate CPNG_29286
Shrimp5	KR528568	Palaemonetes sp. common grass shrimp associated circular virus isolate I0006H
KirkoEqu1	KR902498	Kirkovirus Equ1 (horse associated)
PeCV-PE	KT600065	Human feces pecovirus strain PeCV-PE
Tbat_1	KT732784	Pacific flying fox faeces associated circular DNA virus-9 isolate Tbat_A_77299
Tbat_K	KT732816	Pacific flying fox associated multicomponent virus isolate Tbat_K_12099 segment DNA-R
Tbat_2	KT732818	Pacific flying fox faeces associated circular DNA virus-3 isolate Tbat_38855
Tbat_3	KT732819	Pacific flying fox faeces associated circular DNA virus-4 isolate Tbat_29894
Tbat_4	KT732820	Pacific flying fox faeces associated circular DNA virus-1 isolate Tbat_A_1180
Tbat_6	KT732822	Pacific flying fox faeces associated circular DNA virus-5 isolate Tbat_H_25288
CEV_Blasto2	CBK21220	Unnamed protein product [Blastocystis hominis]	CEV identified by Liu et al. 2011
CEV_Blasto1	CBK22173	Unnamed protein product [Blastocystis hominis]
Tbat_7	KT732823	Pacific flying fox faeces associated circular DNA virus-6 isolate Tbat_H_77994
Tbat_8	KT732824	Pacific flying fox faeces associated circular DNA virus-7 isolate Tbat_H_85975
Tbat_9	KT732825	Pacific flying fox faeces associated circular DNA virus-8 isolate Tbat_H_103163
Tbat_10	KT732827	Pacific flying fox faeces associated circular DNA virus-10 isolate Tbat_A_16877
Tbat_11	KT732828	Pacific flying fox faeces associated circular DNA virus-11 isolate Tbat_H_102636
Tbat_12	KT732829	Pacific flying fox faeces associated circular DNA virus-2 isolate Tbat_A_103763
Tbat_13	KT732830	Pacific flying fox faeces associated circular DNA virus-12 isolate Tbat_H_65519
Tbat_15	KT732832	Pacific flying fox faeces associated circular DNA virus-13 isolate Tbat_A_103819
Tbat_16	KT732833	Pacific flying fox faeces associated circular DNA virus-14 isolate Tbat_5606
Tbat_17	KT732834	Pacific flying fox faeces associated circular DNA virus-15 isolate Tbat_3598
CEV_Ephydr2	na	CVe.Ephydra_hians.5	CEV identified by Dennis et al. 2018
SheepSma1	KT862219	Sheep faeces associated smacovirus 3 isolate 47_Fec58091_sheep, complete sequence
SheepSma2	KT862220	Sheep faeces associated smacovirus 1 isolate 47_Fec58729_sheep, complete sequence
BovSmaco3	KT862222	Bovine faeces associated smacovirus 3 isolate 48_Fec5_cow, complete sequence
PigSmaco1	KT862225	Porcine faeces associated smacovirus 1 isolate 49_Fec25_pig, complete sequence
BovSmaco5	KT862228	Bovine faeces associated smacovirus 4 isolate GP3_45917_cow, complete sequence
BovSmaco6	KT862229	Bovine faeces associated smacovirus 6 isolate GP3_46075_cow, complete sequence
BovCV1	KT862230	Bovine faeces associated circular DNA virus 1 isolate GP3-46075_cow2, complete sequence
Duck1	KT862231	Duck faeces associated circular DNA virus 1 isolate 7_Fec4_duck, complete sequence
Deer	KT862232	Deer faeces associated circular DNA virus 1 isolate 26_Fec35810_deer, complete sequence
Duck2	KT862233	Duck faeces associated circular DNA virus 2 isolate 4_Fec60467_duck, complete sequence
Llama	KT862235	Llama faeces associated circular DNA virus-1 isolate 29_llama, complete sequence
BovCV2	KT862237	Bovine faeces associated circular DNA virus 2 isolate 48_Fec10_cow, complete sequence
BovCM1	KT862256	Bovine faeces associated circular DNA molecule 1 isolate 5_Fec60361_cow, complete sequence
PoCM1	KT862257	Porcine faeces associated circular DNA molecule-1 isolate 23_Fec22_cow, complete sequence
Termite6	na	Termite_Col2_LSPZ01000798	Tikhe et al. 2018
Rat_WRn	KT945154	Rat stool-associated circular ssDNA virus isolate WRn_2012
Cteno1	KT945162	Ctenophore-associated circular virus 1
Cteno2	KT945163	Ctenophore-associated circular virus 2
Cteno3	KT945164	Ctenophore-associated circular virus 3
Cteno4	KT945165	Ctenophore-associated circular virus 4
Rhesus1	KU043396	Unidentified circular ssDNA virus isolate cg3401
Rhesus2	KU043397	Unidentified circular ssDNA virus isolate 2035
Rhesus3	KU043398	Unidentified circular ssDNA virus isolate 8412
Rhesus4	KU043400	Unidentified circular ssDNA virus isolate cg_8815
Rhesus6	KU043405	Unidentified circular ssDNA virus isolate cg_1242 Cap and Rep protein genes, complete cds
Rhesus7	KU043406	Unidentified circular ssDNA virus isolate cg_1467 Cap and Rep genes, complete cds
Rhesus9	KU043411	Unidentified circular ssDNA virus isolate cg1855
Rhesus10	KU043413	Unidentified circular ssDNA virus isolate cg4648
Rhesus12	KU043416	Unidentified circular ssDNA virus isolate cg10456
Rhesus13	KU043420	Unidentified circular ssDNA virus isolate cg6502
Rhesus17	KU043424	Unidentified circular ssDNA virus isolate cg5269
Rhesus18	KU043425	Unidentified circular ssDNA virus isolate cg8094 Rep and Cap genes, complete cds
Rhesus22	KU043433	Unidentified circular ssDNA virus isolate cg2186 Rep gene, partial cds
Rhesus23	KU043436	Unidentified circular ssDNA virus isolate cg3580 Rep and Cap genes, complete cds
Rhesus26	KU043448	Unidentified circular ssDNA virus isolate cg5862 Rep gene, complete cds; and Cap gene, partial cds
PoSerBR3	KU203353	Porcine serum-associated circular virus isolate BR3
PoSerBR4	KU203354	Porcine serum-associated circular virus isolate BR4
AvianA1	KU230452	Avian-like circovirus isolate A1 replication-associated protein gene, complete cds (tick associated)
HV-CV1	KU343138	Unidentified circular ssDNA virus (human associated)
HPoSCV5	KY052047	Human PoSCV5-like circular virus
CyCVlikeGT	KY348843	Cyclovirus sp. isolate GT1256 (bat associated)
Garrulus	KY884302	Garrulus glandarius associated circular virus 1 strain GgaCV-1/1
Seal_JPN1	LC133373	Fur seal faeces associated circular DNA virus DNA, isolate: JPN1
HuTarto	MF118166	Human fecal virus Tarto
HuJorvi2	MF118167	Human fecal virus Jorvi2
HuJorvi3	MF118168	Human fecal virus Jorvi3
HuJorvi4	MF118169	Human fecal virus Jorvi4
PandaCV1	MF327573	Giant panda circovirus 1 strain gpci001
PandaCV2	MF327574	Giant panda circovirus 2 strain gpci002
PandaCV3	MF327575	Giant panda circovirus 3 strain gpci003
PandaCV4	MF327576	Giant panda circovirus 4 strain gpci004
Varroa	MG571088	Varroa mite associated virus 1
Idotea	MG023125	Idotea virus IWaV278
I0178_Cruci	MH545523	Fire ant associated circular virus 1 (FaACV-1)
I0910_Beetle	MH545527	Water beetle associated circular virus 1 (WbACV-1)
I1020_BlowFly	MH545530	Fly associated circular virus 6 (FlyACV-6)
I1021_BlowFly	MH545531	Fly associated circular virus 7 (FlyACV-7)
Giardia1	ESU34896	RNA helicase [Giardia intestinalis]
Giardia2	EES99726	Replication-associated protein REP1, putative [Giardia intestinalis ATCC 50581]
I1393_Millipede	MH545532	Millipede associated circular virus 1 (MpACV-1)
I1608_Spi	MH545533	Tent-web spider associated circular virus 1 (TewSACV-1)
I1648A_Spi	MH545534	Pimoid spider associated circular virus 2 (PiSACV-2)
I1653_Spi	MH545539	Spider associated circular virus 3 (SACV-3)
I1655D_Spi	MH545535	Sierra dome spider associated circular virus 2 (SdSACV-2)
I1657E_Spi	MH545536	Giant house spider associated circular virus 1 (GhSACV-1)
I1661E_Spi	MH545537	Giant house spider associated circular virus 3 (GhSACV-3)
I1654B_Spi	MH545538	Common house spider circular molecule 1 (ChSCM-1)
I1646E_Spi	MH545540	Woodlouse hunter spider associated circular virus 1 (WhSACV-1)
I1657I_Spi	MH545541	Giant house spider associated circular virus 4 (GhSACV-4)
I1659B_Spi	MH545542	False black widow spider associated circular virus 1 (FbwSACV-1)
I0180_Volvo	MH545526	Cricket associated circular virus 1 (CrACV-1)
I0831_Circu	MH545518	Spinybacked orbweaver circular virus 1 (SpOrbCV-1)
I960_Circu	MH545520	Golden silk orbweaver associated circular virus 1(GsOrbACV-1)
I1601_Circu	MH545521	Long-jawed orbweaver circular virus 1 (LjOrbCV-1)
I1594_Circu	MH545519	Spinybacked orbweaver circular virus 1 (SpOrbCV-1)
I1644C_Circu	MH545522	Cybaeus spider associated circular virus 1 (CySACV-1)
I1644A_CM	MH545543	Cybaeus spider associated circular molecule 1 (CySACM-1)
I1022_Smaco	MH545524	Fly associated circular virus 3 (FlyACV-3)
I1035_Smaco	MH545525	Fly associated circular virus 4 (FlyACV-4)
Hymeno	CDS32196	Replication association protein [Hymenolepis microstoma]	CEV identified through BLAST searches
RodentCV	KY370028	Rodent circovirus
CEV_Ant	na	CVe.Pseudomyrmex_gracilis.1	CEV identified by Dennis et al. 2018
CEV_Loaloa	EFO13349	Replication-associated protein [Loa loa]	CEV identified by Liu et al. 2011
CEV_Wuche	ADBV01018817	Wuchereria bancrofti (ADBV01018817.1:144-968)	CEV identified by Liu et al. 2011
CEV_Oncho	OZC10663	RNA helicase [Onchocerca flexuosa]	CEV identified by Liu et al. 2011
CEV_Varroa1	XR_002680015	Varroa jacobsoni uncharacterized LOC111260048	CEV identified by Liu et al. 2011
CEV_Varroa2	XM_022795351	Varroa destructor uncharacterized LOC111246180	CEV identified by Liu et al. 2011
Cyclo_2	NC_032682	Human assocciated cyclovirus (HuACyVIECSF08)
CroACyV1	JX569794	Cockroach associated cyclovirus
Cyclo_13	JF938082	Bat associated cyclovirus
Cyclo_21	KJ641714	Bat associated cyclovirus
Cyclo_22	KT732786	Bat associated cyclovirus
Cyclo_23	KR902499	Horse associated cyclovirus
DfACyV3	JX185424	Dragonfly associated cyclovirus
I1586_B9	MH545515	Spinybacked orbweaver circular virus 2 (SpOrbCV-2)
Cyclo_26	NC_034977	Duck associated cyclovirus
I1338_Cyclo	MH545511	Arboreal ant associated circular virus 1 (AaACV-1)
I1022_Cyclo	MH545514	Fly associated circular virus 1 (FlyACV-1)
I1022b_Cyclo	MH545517	Fly associated circular virus 5 (FlyACV-5)
I1647E_Cyclo	MH545516	Soft spider associated circular virus 1 (SoSACV-1)
Circo_1	EU056309	Swan circovirus
Circo_5	DQ845074	Gull circovirus
Circo_8	AB072301	Porcine circovirus 2
Circo_17	KT869077	Porcine circovirus 3
CEV_Agapo	na	CVe.Psittaciformes.Agapornis_roseicollis.2	CEV identified by Dennis et al. 2018
CEV_Loxos	na	CVe.Loxosceles_reclusa.7	CEV identified by Dennis et al. 2018
CEV_Krypto	na	CVe.Cyprinodontiformes.Kryptolebias_marmoratus.4	CEV identified by Dennis et al. 2018
CEV_Serp1	na	CVe.Serpentes.Crotalus_mitchellii_pyrrhus.1	CEV identified by Dennis et al. 2018
CEV_Serp2	na	CVe.Serpentes.Crotalus_horridus.1	CEV identified by Dennis et al. 2018
Bat_B04381	KY302870	Circovirus sp. strain B04381/Srb/2014, complete genome (bat associated)
Bat_Bb1	KY302869	Circovirus sp. strain Bb1/Hun/2013, complete genome (bat associated)
CEV_Lacca	XP_001887813	Predicted protein [Laccaria bicolor S238N-H82]	CEV identified by Liu et al. 2011
TaCV2	MF804498	Circoviridae TaCV2, complete genome (bird associated)
CEV_AsperF	ABDB01000026	Aspergillus fumigatus (ABDB01000026.1:88877-89998)	CEV identified by Liu et al. 2011
CEV_Tuber1	CABJ01002799	Tuber melanosporum (CABJ01002799.1:51549-52532)	CEV identified by Liu et al. 2011
Gemydugu_1	HQ335086	Mosquito associated gemyduguivirus
Gemykibi_1	JX185428	Dragonfly associated gemykibivirus 1
Gemyton_1	KF371630	Ostrich associated gemytondvirus 1
Gemykron_1	KF371631	Rabbit associated gemykronzavirus 1
Gemygor_1	KF371632	Starling associated gemygorvirus 1
Gemycir_2	KF371636	Gerygone associated gemycircularvirus 1
Gemykruz_1	KF371639	Gerygone associated gemykruznivirus 3
Gemykrog_1	KJ547634	Sewage derived gemykrogvirus 1
Gemydugu_3	KM598387	Odonata associated gemyduguivirus 2
Gemyvon_1	KP974693	Human associated gemyvongvirus 1
Gemykruz_2	KT598248	Soybean associated gemykruznivirus 1
Gemykolo_1	KT732798	Pteropus associated gemykolovirus 1
Gemykruz_3	KT862242	Chicken associated gemykruznivirus 2
Gemycir_13	MF669479	Cattle bloodassociated gemycircularvirus Bmv002
Gemycir_15	KY312557	Crane Gemycircularvirus yc18
Gemycir_16	NC_035477	Porcine fecesassociated gemycircularvirus BEL15V010
Gemycir_19	MF327567	Giant pandaassociated gemycircularvirus gpge010
Bat_V16	KY302868	Bat V16 Nimivirus
Gemycir_28	NC_033270	Chicken stoolassociated gemycircularvirus RSBR2015
GrassSDBVL	MH545499	Grasshpopper associated circular virus 1 (GhACV-1)
I1648B	MH545500	Pimoid spider associated circular molecule 1 (PiSACM-1)
I1652A	MH545501	Tube-web spider associated circular virus 1 (TuwSACV-1)
TACV2	MH545502	Termite associated circular virus 2 (TACV-2)
TACV4	MG917677	Termite associated circular virus 4 (TACV-4)
TACV3	MG917676	Termite associated circular virus 3 (TACV-3)
TACV1	MG917674	Termite associated circular virus 1 (TACV-1)
I1644D	MH545503	Spider associated circular virus 1 (SACV-1)
I1644B	MH545507	Cybaeus spider associated circular virus 2 (CySACV-2)
I1655A	MH545510	Sierra dome spider associated circular virus 1 (SdSACV-1)
Nano_1	AJ749894	Faba bean necrotic stunt virus
Nano_2	EF546807	Abaca bunchy top virus isolate Q1108
Nano_3	HE654123	Faba bean yellow leaf virus
Nano_4	JF957636	Banana bunchy top virus isolate TOS28
Nano_5	KC978958	Black medic leafroll virus isolate Bjuv_153
Nano_6	KC979027	Faba bean necrotic yellows virus isolate Roldan_Mu-R4
Nano_7	KC979043	Pea necrotic yellow dwarf virus isolate Gross-Enzersdorf_1
Nano_8	KC979054	Pea yellow stunt virus
Nano_9	KF710624	Cardamom bushy dwarf virus isolate YUK4
Nano_10	LC010103	Milk vetch dwarf virus DNA
Alpha_1	AB000920	Milk vetch dwarf C1 alphasatellite
Alpha_2	AB000921	Milk vetch dwarf C2 alphasatellite
Alpha_3	AB009047	Milk vetch dwarf C10 alphasatellite
Alpha_4	AF216221	Banana bunchy top virus satellite S1
Alpha_5	AF216222	Banana bunchy top virus satellite S2
Alpha_6	AJ005966	Faba bean necrotic yellows C9 alphasatellite
Alpha_7	AJ416153	Ageratum yellow vein virus associated DNA
Alpha_8	EU384640	Gossypium darwinii symptomless alphasatellite isolate Octaalpha11
Alpha_9	EU384647	Gossypium darwinii symptomless alphasatellite isolate Puncalpha5
Alpha_10	FJ218495	Gossypium mustelinum symptomless alphasatellite
Alpha_11	FN675284	Okra yellow crinkle Cameroon alphasatellite CM:Lys1sp2:09
Alpha_13	HG969293	Okra leaf curl alphasatellite
Alpha_14	JX458742	Dragonfly associated alphasatellite isolate PR NZ48 2009
Alpha_15	KT099172	Alphasatellite 2 isolate GtTo22
Alpha_16	KT716081	Bhindi yellow vein alphasatellite
Alpha_17	KT948075	Cucurbit yellow mosaic alphasatellite isolate 51SA
Alpha_19	KX534400	Sophora alopecuroides yellow stunt alphasatellite 7a isolate Ta1
Alpha_20	KX534402	Sophora alopecuroides yellow stunt alphasatellite 2 isolate Ta1
Alpha_21	KX534408	Sophora alopecuroides yellow stunt alphasatellite 4 isolate Ta1
Alpha_22	KX534409	Sophora alopecuroides yellow stunt alphasatellite 9 isolate Ta1
Alpha_23	M29963	Coconut foliar decay alphasatellite
Bacilla2	AB844272	Chaetoceros sp. DNA virus 7
Bacilla3	AB193315	Chaetoceros salsugineum DNA virus
Bacilla4	AB553581	Chaetoceros lorenzianus DNA virus
Bacilla5	AB597949	Chaetoceros tenuissimus DNA virus
Bacilla6	KF133809	Bacillariodnavirus LDMD-2013
Bacilla7	KY405006	Amphibola crenata associated bacilladnavirus 1 isolate GaBacV1
Bacilla8	KY405007	Amphibola crenata associated bacilladnavirus 2 isolate GaBacV2
Bacilla9	KY405008	Avon-Heathcote estuary associated bacilladnavirus isolate AHEaBavV1
Gemini_4	ASA49171	Rice latent virus 1
Gemini_5	ALR86883	Turnip leaf roll virus
Gemini_6	AIC83128	Bhendi yellow vein mosaic virus
Gemini_8	AGR84130	African cassava mosaic virus
Gemini_9	AGR84101	East African cassava mosaic Cameroon virus
Gemini_26	CAM97882	Cotton leaf curl virus-1 (Shadadpur Sindh)
Gemini_28	YP_009129321	Mulberry mosaic dwarf associated virus
Gemini_38	YP_002875759	Eragrostis curvula streak virus
Gemini_39	AEI17660	African cassava mosaic virus
Gemini_50	AIY33762	Maize streak Reunion virus
Gemini_54	YP_009021763	Axonopus compressus streak virus
Gemini_58	YP_003915159	Digitaria didactyla striate mosaic virus
Gemini_61	YP_003560503	Sweet potato leaf curl Bengal virus
Gemini_62	YP_001941155	Urochloa streak virus
Gemini_74	AGS77263	Mungbean yellow mosaic virus
Gemini_75	YP_001144448	Sida yellow vein Madurai virus
Gemini_79	MF185006	Wild vitis virus 1 isolate WVV1-NY1424
Gemini_81	HQ443515	Spinach curly top Arizona virus
PhomopCV	YP_009351871	Phomopsis longicolla circular virus 1
Gemini_85	KT214389	Plantago lanceolata latent virus

## Sheet: W3_NonCRESS-DNA
	Sample and genome information for non-CRESS DNA molecules detected in terrestrial arthropods.
	Accession Number	Collection Date	Location	Specimen species name1	Genome ID	Size	Identified ORF	Best BLAST match (accession number)	Identity (%)2
	MH545544	Mar-2014	Puerto Rico	Subfamily Coreinae*	Leaf-footed bug associated circular molecule 1 (LfBACM-1)	1185	Capsid	Pacific flying fox associated multicomponent virus Tbat K (KT732815)	36
	MH545546	Mar-2014	Puerto Rico	Leucauge argyra*	Spider associated circular molecule 2 (SACM-2)	843	Capsid	Sewage-associated circular DNA virus-31 (NC_026276)	42
	MH545545	Mar-2014	Puerto Rico	nd	Longjawed orbweaver circular molecule 1 (LjOrbCM-1)	1081	Large T antigen	Baja California bark scorpion polyomavirus 1 (CRI06403)	30
	MH545547	May-2017	Victoria BC	Eratigena atrica	Giant house spider associated circular molecule 1 (GhSACM-1)	3608	Large T antigen	Chlorocebus pygerythrus polyomavirus 3 (NC_025898)	34
	1Many specimens were taxonomically identified by sample providers. However, some specimens were identified through DNA barcoding and are indicated with an asterisk (*); nd = not determined
	2Pairwise amino acid identities between identified ORF and best protein sequence matches in GenBank
